# Supplementary material
Source: PubMed Central journal article supplement (PMC7901670)
Supplement: NIHMS1666277-supplement-Supplementary_Materials.pdf [file NIHMS1666277-supplement-Supplementary_Materials.pdf]

## Supplementary Materials for

### **Tau and other proteins found in Alzheimer's disease spinal fluid are linked to retromer-mediated endosomal traffic in mice and humans**

Sabrina Simoes, Jessica L. Neufeld, Gallen Triana-Baltzer, Setareh Moughadam, Emily I. Chen, Milankumar Kothiya, Yasir H. Qureshi, Vivek Patel, Lawrence S. Honig, Hartmuth Kolb, Scott A. Small\*

\*Corresponding author. Email: [sas68@columbia.edu](mailto:sas68@columbia.edu)

Published 25 November 2020, *Sci. Transl. Med.* **12**, eaba6334 (2020)  
DOI: 10.1126/scitranslmed.aba6334

#### **The PDF file includes:**

- Fig. S1. n-APLP1 and n-CHL1 correlation analysis based on MS/MS peak intensity measurements.
- Fig. S2. NeuN immunostaining and quantification of retromer protein expression in 3-month-old *Vps35* cKOs and control littermates.
- Fig. S3. Development and qualification of Simoa APLP1 and CHL1 assays.
- Fig. S4. Extended data of Western blots cropped in main Fig. 1.
- Fig. S5. Extended data of Western blots cropped in main Fig. 4A.
- Fig. S6. Extended data of Western blots cropped in main Fig. 4D.
- Legends for data files S1 to S3

#### **Other Supplementary Material for this manuscript includes the following:**

(available at [stm.sciencemag.org/cgi/content/full/12/571/eaba6334/DC1](http://stm.sciencemag.org/cgi/content/full/12/571/eaba6334/DC1))

- Data file S1. Completed list of proteins identified in murine CSF (provided as a separate Excel file).
- Data file S2. List of peptides detected by MS/MS analysis (provided as a separate Excel file).
- Data file S3. Individual-level data (provided as a separate Excel file).

## Supplemental Materials

### Supplementary Figures

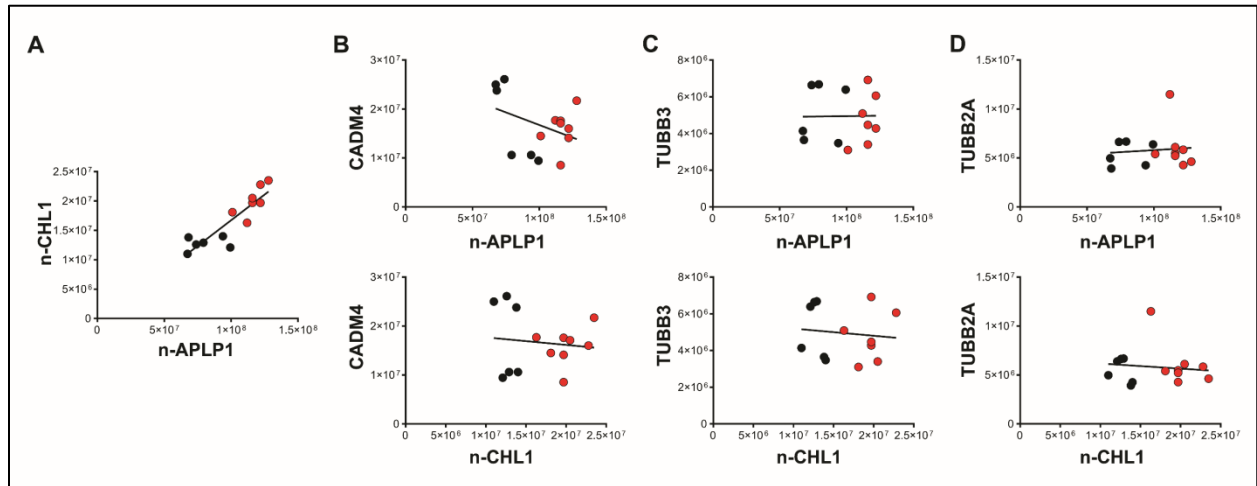

**Fig. S1. n-APLP1 and n-CHL1 correlation analysis based on MS/MS peak intensity measurements.** (A) Scatter plot showing relationship between n-APLP1 and n-CHL1 in the CSF of *Vps35* cKO mice (red circles) and controls (black circles) ( $n = 14$ ,  $r = 0.89$ ,  $P < 0.0001$ , with a  $R^2 = 0.787$ ). (B) Scatter plot showing relationship between CADM4 and n-APLP1 ( $n = 14$ ,  $r = -0.377$ ,  $P = 0.184$ , with a  $R^2 = 0.142$ ), or between CADM4 and n-CHL1 ( $n = 14$ ,  $r = -0.111$ ,  $P = 0.706$ , with a  $R^2 = 0.012$ ). (C) Scatter plot showing relationship between TUBB3 and n-APLP1 ( $n = 14$ ,  $r = 0.013$ ,  $P = 0.967$  with a  $R^2 = 0.00016$ ), or between TUBB3 and n-CHL1 ( $n = 14$ ,  $r = -0.108$ ,  $P = 0.7262$ , with a  $R^2 = 0.012$ ). (D) Scatter plot showing relationship between TUBB2a and n-APLP1 ( $n = 14$ ,  $r = 0.094$ ,  $P = 0.750$  with a  $R^2 = 0.008$ ), or between TUBB2a and n-CHL1 ( $n = 14$ ,  $r = -0.117$ ,  $P = 0.689$ , with a  $R^2 = 0.014$ ). Of note, all technical replicates were used for the analysis.

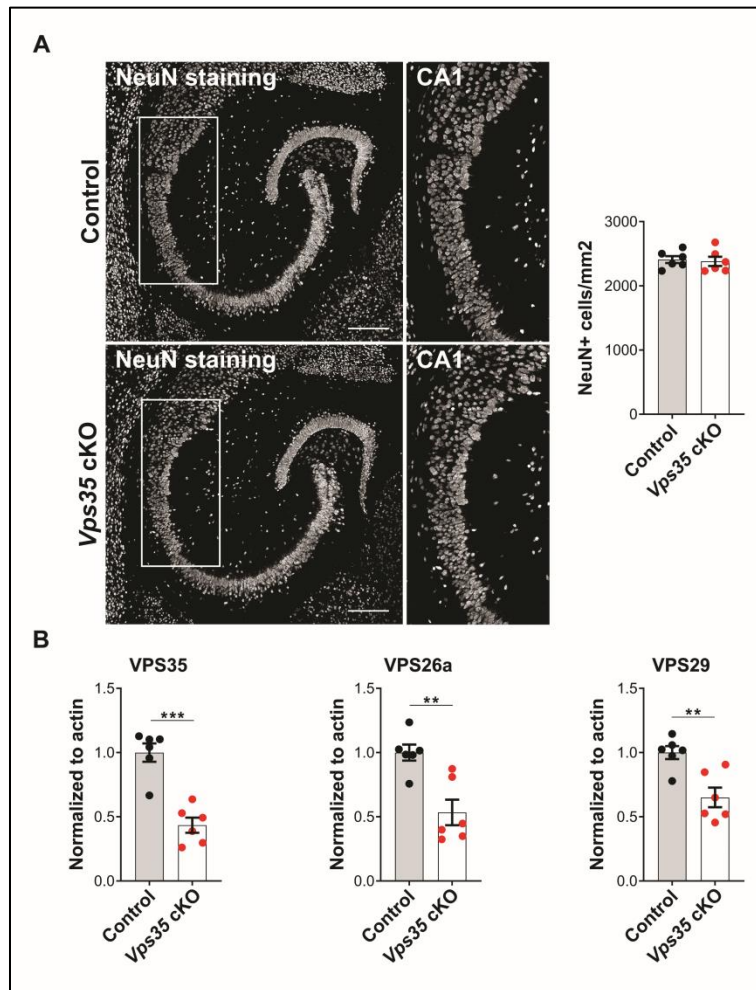

**Fig. S2. NeuN immunostaining and quantification of retromer protein expression in 3-month-old *Vps35* cKOs and control littermates.** (A) Representative NeuN staining showing neurons in the hippocampus of 3 month-old *Vps35* cKO mice compared to their control littermates ( $P = 0.6991$ , in a non-parametric Mann Whitney test.  $n = 6$  animals/genotype). Hippocampal CA1 regions are shown at higher magnification. Scale bar, 200 $\mu$ m. (B) Quantification of western blot analysis shown in Figure 4D. Data are shown as means  $\pm$  SEM. Two-tailed unpaired student T-test was used for the statistical analysis ( $*P < 0.05$ ).

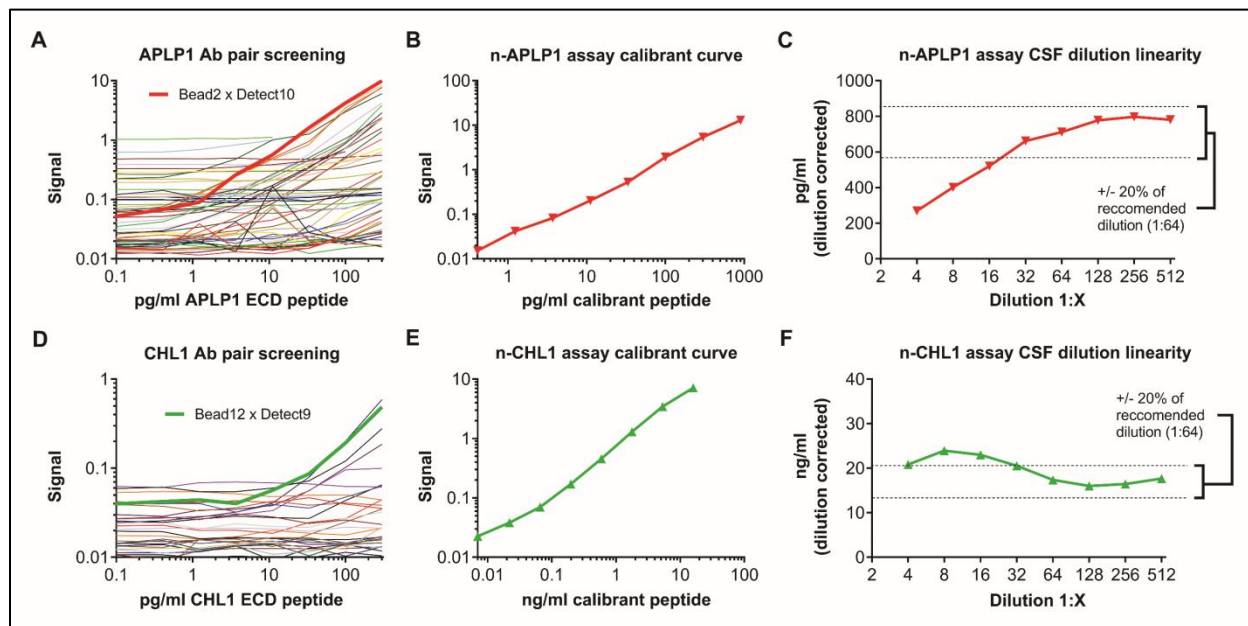

**Fig. S3. Development and qualification of Simoa APLP1 and CHL1 assays. (upper panels):**

A panel of 8 commercial antibodies raised against human APLP1 were screened in all configurations against recombinant APLP1 protein on Simoa HD-1 platform (**A**). The most sensitive assay (2x10 aka n-APLP1) was optimized; standard curve range (**B**) and dilution linearity with healthy control CSF (**C**) are shown. (**lower panels**): A panel of 6 commercial antibodies raised against human CHL1 were screened in all configurations against recombinant CHL1 protein on Simoa HD-1 platform (**D**). The most sensitive assay (12x9 aka n-CHL1) was optimized; standard curve range (**E**) and dilution linearity with healthy control CSF (**F**) are shown.

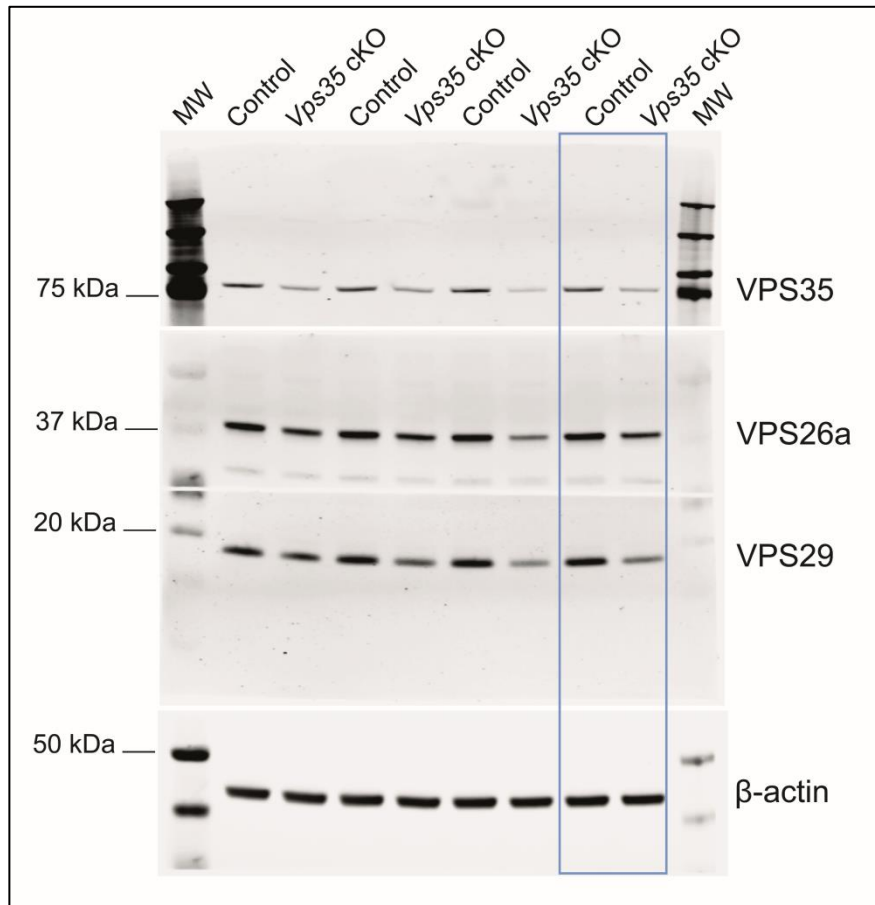

**Fig. S4. Extended data of Western blots cropped in main Fig. 1.** Blue rectangles indicate lanes cropped. MW, molecular weight.

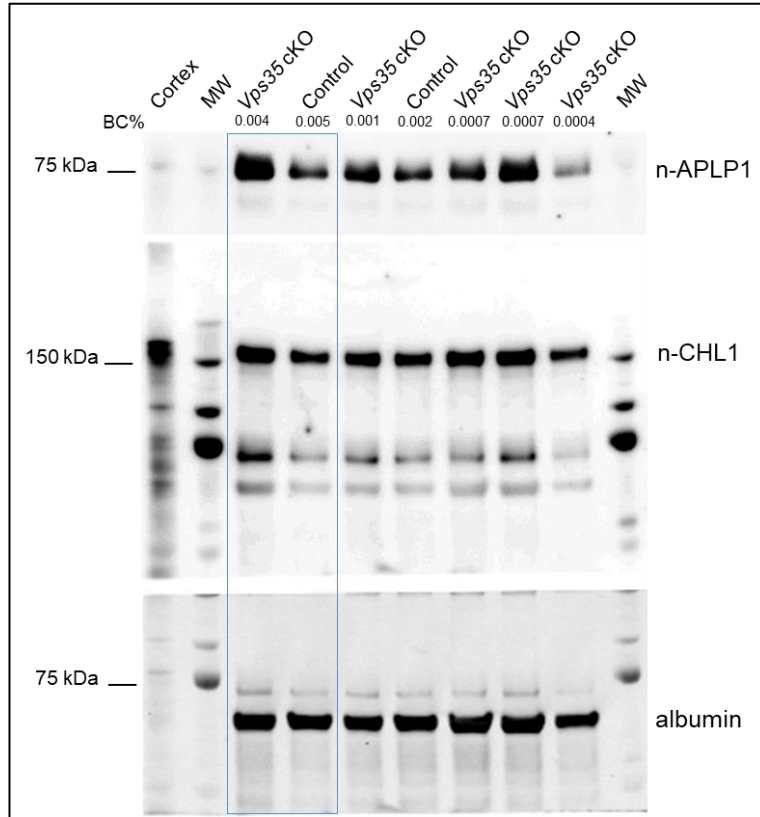

**Fig. S5. Extended data of Western blots cropped in main Fig. 4A.** Blue rectangles indicate lanes cropped. BC%, percentage of blood contamination; MW, molecular weight.

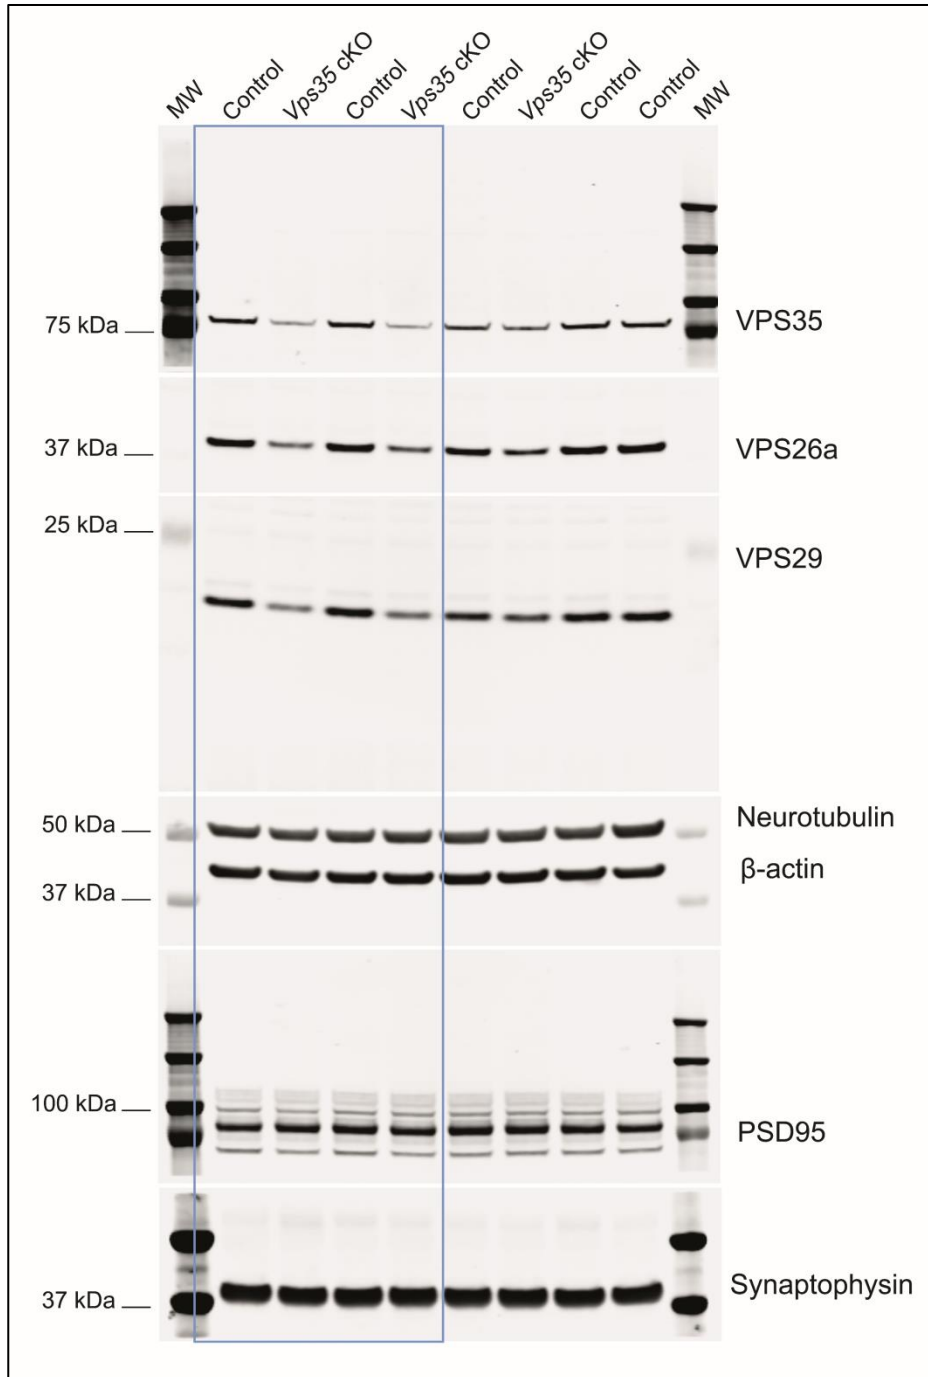

**Fig. S6. Extended data of Western blots cropped in main Fig. 4D.** Blue rectangles indicate lanes cropped. MW, molecular weight.

**Data file S1. Completed list of proteins identified in murine CSF (provided as a separate Excel file).**

**Data file S2. List of peptides detected by MS/MS analysis (provided as a separate Excel file).**

**Data file S3. Individual-level data (provided as a separate Excel file).**
